# Supplementary material for: Barriers to Long-Term Follow-Up Among Patients in Cardiovascular-Metabolic Clinics: A Qualitative Study Based on the COM-B Model
Source: Research Square preprint supplement (doi:10.21203/rs.3.rs-7707653/v1), 2025-10-28
Supplement: Supplementary file 1 [file 72654dc155b2f89cc5c0590a.docx]

**Supplementary file:**

**Interview guide on Barriers to Long-Term Follow-Up Among Patients in Cardiovascular-Metabolic Clinics**

1. What was your initial motivation for attending the cardiometabolic clinic?
2. In what ways did you feel the clinic helped you?
3. What were the reasons you discontinued participation in the clinic?
4. What impact did discontinuing follow-up have on your disease management?
5. What factors might encourage you to resume follow-up at the cardiometabolic clinic?

(6)What suggestions or opinions do you have regarding improvements to the cardiometabolic clinic?
